# Supplementary material for: Psychological Associations of Stress with the Level of Health Locus of Control and Self-Efficacy in Patients with Ovarian Cancer
Source: MDPI journal article supplement (doi:10.3390/jcm12216816), 2023-10-28
Supplement: s1 [file s1]

R. Schwarzer, M. Jerusalem, Z. Juczyński

## Wersja polska GSES

Wydanie drugie

..... wiek.....płeć M K data badania.....

Poniżej przedstawiono kilka stwierdzeń odnoszących się do różnych cech osobistych. Po przeczytaniu każdego stwierdzenia należy zdecydować, czy w stosunku do ciebie są one prawdziwe czy fałszywe.

Poszczególne punkty skali oznaczają:

1 – NIE 2 – raczej NIE 3 – raczej TAK 4 – TAK

- |                                                                                                                                       |   |   |   |   |
|---------------------------------------------------------------------------------------------------------------------------------------|---|---|---|---|
| 1. Zawsze jestem w stanie rozwiązać trudne problemy, jeśli tylko wystarczająco się postaram .....                                     | 1 | 2 | 3 | 4 |
| 2. Nawet, gdy ktoś mi się sprzeciwia, jestem w stanie znaleźć sposób na osiągnięcie tego, czego chcę .....                            | 1 | 2 | 3 | 4 |
| 3. Z łatwością potrafię trzymać się swoich celów i je osiągać .....                                                                   | 1 | 2 | 3 | 4 |
| 4. Jestem przekonany, że skutecznie poradziłbym sobie z nieoczekiwanymi wydarzeniami .....                                            | 1 | 2 | 3 | 4 |
| 5. Dzięki swojej pomysłowości i zaradności wiem, jak poradzić sobie z nieprzewidywanymi sytuacjami .....                              | 1 | 2 | 3 | 4 |
| 6. Jestem w stanie rozwiązać większość problemów, jeśli tylko włożę w to odpowiednio dużo wysiłku .....                               | 1 | 2 | 3 | 4 |
| 7. Kiedy zmagam się z przeciwnościami, jestem w stanie zachować spokój, gdyż mogę polegać na swoich umiejętnościach radzenia sobie .. | 1 | 2 | 3 | 4 |
| 8. Kiedy zmagam się z jakimś problemem, to zazwyczaj jestem w stanie znaleźć kilka sposobów jego rozwiązania .....                    | 1 | 2 | 3 | 4 |
| 9. Gdy mam kłopoty, to zazwyczaj jestem w stanie wymyślić sposób, jak z nich wyjść .....                                              | 1 | 2 | 3 | 4 |
| 10. Zazwyczaj jestem w stanie poradzić sobie z tym, co mnie spotyka ...                                                               | 1 | 2 | 3 | 4 |

|     |      |
|-----|------|
| PWS | sten |
|     |      |

Wydanie polskie: Copyright © 2012 by Pracownia Testów Psychologicznych Polskiego Towarzystwa Psychologicznego Sp. z o.o.  
ul. Belwederska 6A, 00-762 Warszawa  
www.practest.com.pl

K. A. Wallston, B. S. Wallston i R. DeVellis

**MHLC - wersja A**

Adaptacja: Z. Juczyński

..... wiek ..... płęć M K data badania .....

Skala przedstawia poglądy różnych ludzi na pewne istotne zagadnienia związane ze zdrowiem. Każde stwierdzenie wyraża pogląd, z którym można się zgodzić lub nie. Chodzi tu o osobiste przekonanie i nie ma tu odpowiedzi ani dobrych ani złych. Ważne jest, aby odpowiadać zgodnie z własnymi przekonaniem, a nie z tym – co powinno się sądzić.

Obok znajdują się odpowiedzi od „**zdecydowanie nie zgadzam się**” (1) – do „**zdecydowanie zgadzam się**” (6). Przy każdym zdaniu należy otoczyć kółkiem liczbę, która wyraża właściwy stopień zgody. Należy podać jedną odpowiedź dla każdego stwierdzenia. Poszczególne liczby oznaczają:

|                                                    |                                             |                                            |                                        |                                         |                                                |
|----------------------------------------------------|---------------------------------------------|--------------------------------------------|----------------------------------------|-----------------------------------------|------------------------------------------------|
| <b>NIE</b><br>zdecydowanie<br>nie zgadzam się<br>1 | w pewnym<br>stopniu<br>nie zgadzam się<br>2 | w małym<br>stopniu<br>nie zgadzam się<br>3 | w małym<br>stopniu<br>zgadzam się<br>4 | w pewnym<br>stopniu<br>zgadzam się<br>5 | <b>TAK</b><br>zdecydowanie<br>zgadzam się<br>6 |
|----------------------------------------------------|---------------------------------------------|--------------------------------------------|----------------------------------------|-----------------------------------------|------------------------------------------------|

1. Kiedy choruję, to od mojego zachowania zależy, jak szybko  
wyzdrowieję ..... 1 2 3 4 5 6
2. Jeżeli mam zachorować, to zachoruję niezależnie od tego, co zrobię .... 1 2 3 4 5 6
3. Utrzymywanie regularnych kontaktów z lekarzem jest najlepszym  
sposobem uniknięcia choroby ..... 1 2 3 4 5 6
4. Większość tego, co wpływa na moje zdrowie, zdarza się przez  
przypadek ..... 1 2 3 4 5 6
5. Kiedy tylko poczuję się źle, konsultuję się z lekarzem ..... 1 2 3 4 5 6
6. Ja sam decyduję o swoim zdrowiu ..... 1 2 3 4 5 6
7. Inni ludzie (np. lekarze, pielęgniarki, rodzina, przyjaciele) mają  
wpływ na to, czy zachoruję, czy pozostanę zdrowy ..... 1 2 3 4 5 6
8. Kiedy choruję, winą leży po mojej stronie ..... 1 2 3 4 5 6
9. To, jak szybko wyzdrowieję, zależy w dużym stopniu od szczęścia ..... 1 2 3 4 5 6
10. Lekarze decydują o moim zdrowiu ..... 1 2 3 4 5 6

**Proszę odwrócić kartkę**

Wydanie polskie: Copyright © 2012 by Pracownia Testów Psychologicznych Polskiego Towarzystwa Psychologicznego Sp. z o.o.  
ul. Belwederska 6A, 00-762 Warszawa  
www.practest.com.pl

|                                                           |                                                    |                                                   |                                               |                                                |                                                       |
|-----------------------------------------------------------|----------------------------------------------------|---------------------------------------------------|-----------------------------------------------|------------------------------------------------|-------------------------------------------------------|
| <b>NIE</b><br>zdecydowanie<br>nie zgadzam się<br><b>1</b> | w pewnym<br>stopniu<br>nie zgadzam się<br><b>2</b> | w małym<br>stopniu<br>nie zgadzam się<br><b>3</b> | w małym<br>stopniu<br>zgadzam się<br><b>4</b> | w pewnym<br>stopniu<br>zgadzam się<br><b>5</b> | <b>TAK</b><br>zdecydowanie<br>zgadzam się<br><b>6</b> |
|-----------------------------------------------------------|----------------------------------------------------|---------------------------------------------------|-----------------------------------------------|------------------------------------------------|-------------------------------------------------------|

- 
11. Kiedy jestem zdrowy, mam po prostu szczęście ..... 1 2 3 4 5 6
12. Moje samopoczucie fizyczne zależy od tego, jak dobrze dbam o siebie ... 1 2 3 4 5 6
13. Kiedy choruję, to wiem, że to dlatego, iż o siebie nie zadbałem ..... 1 2 3 4 5 6
14. Opieka, którą otrzymuję od innych, decyduje o tym jak szybko  
powracam do zdrowia ..... 1 2 3 4 5 6
15. Nawet jeśli dbam o siebie, łatwo mogę zachorować ..... 1 2 3 4 5 6
16. Kiedy choruję, jest to sprawa losu ..... 1 2 3 4 5 6
17. Pozostanę raczej zdrowy, jeżeli dobrze zadbam o siebie ..... 1 2 3 4 5 6
18. Dokładne wypełnianie poleceń lekarza jest najlepszym sposobem  
zachowania dobrego zdrowia ..... 1 2 3 4 5 6
- 

|   |   |   |
|---|---|---|
| W | I | P |
|   |   |   |

## KWESTIONARIUSZ CISS

Norman S. Endler & James D. A. Parker

Imię i nazwisko ..... Wiek ..... Płeć .....  
 Wykształcenie ..... Zawód ..... Data badania .....

**INSTRUKCJA:** poniższe zadania opisują różne reakcje ludzi na trudne, przykre, stresujące sytuacje. Zakreśl kółkiem jedną z cyfr od 1 do 5 przy każdym stwierdzeniu. Określ w ten sposób, jak bardzo angażujesz się w te czynności, gdy znajdziesz się w trudnej, przykrej, stresującej sytuacji.

- 1 - nigdy
- 2 - bardzo rzadko
- 3 - czasami
- 4 - często
- 5 - bardzo często

1. Lepiej planuję swój czas ..... 1 2 3 4 5
2. Koncentruję się na problemie i zastanawiam się, jak mogę go rozwiązać ..... 1 2 3 4 5
3. Myślę o czasach gdy było mi lepiej ..... 1 2 3 4 5
4. Staram się przebywać z innymi ludźmi ..... 1 2 3 4 5
5. Oskarżam się o zwlekanie ..... 1 2 3 4 5
6. Robię to, co uważam za najlepsze ..... 1 2 3 4 5
7. Jestem skupiony(a) na swoich dolegliwościach fizycznych ..... 1 2 3 4 5
8. Winię siebie, że wpadłem(am) w taką sytuację ..... 1 2 3 4 5
9. Włóczę się po sklepach ..... 1 2 3 4 5
10. Ustalam, co w danej sytuacji jest najważniejsze ..... 1 2 3 4 5
11. Staram się zasnąć ..... 1 2 3 4 5
12. Objadam się ulubioną potrawą ..... 1 2 3 4 5
13. Niepokoję się, że sobie nie poradzę ..... 1 2 3 4 5
14. Staję się bardzo napięty(a) ..... 1 2 3 4 5
15. Myślę o tym, jak rozwiązywałem(am) podobne problemy w przeszłości ..... 1 2 3 4 5
16. Wmawiam sobie, że to w rzeczywistości nie dzieje się mnie ..... 1 2 3 4 5
17. Winię siebie, że zbyt się tym przejmuję ..... 1 2 3 4 5
18. Idę coś zjeść na mieście ..... 1 2 3 4 5

Copyright © [1999], Multi-Health Systems Inc. Międzynarodowe prawo autorskie obowiązujące we wszystkich krajach w ramach Konwencji z Berna, Bilateralnej Konwencji o Prawie Autorskim i Uniwersalnej Konwencji o Prawie Autorskim. Wszystkie prawa zastrzeżone. Zabrania się dokonywania tłumaczenia lub powielania w całości lub w części, przechowywania w jakichkolwiek bankach danych oraz przesyłania w jakiegokolwiek formie lub jakimikolwiek środkami kopiującymi, mechanicznymi, elektronicznymi, zapisującymi lub innymi, bez wcześniejszej pisemnej zgody Multi-Health Systems Inc., 3770 Victoria Park Avenue, Toronto, Ontario M2H 3M6. Polskie wydanie zaadaptowane i opublikowane w 2003 roku przez Pracownię Testów Psychologicznych Polskiego Towarzystwa Psychologicznego, ul. Belwederska 6A, 00-762 Warszawa, na mocy licencji udzielonej przez Multi-Health Systems Inc.

- |                                                                                                         |   |   |   |   |   |
|---------------------------------------------------------------------------------------------------------|---|---|---|---|---|
| 19. Staję się bardzo przygnębiony(a) .....                                                              | 1 | 2 | 3 | 4 | 5 |
| 20. Kupuję sobie coś .....                                                                              | 1 | 2 | 3 | 4 | 5 |
| 21. Wyznaczam sobie kierunek działania i postępuję zgodnie z nim .....                                  | 1 | 2 | 3 | 4 | 5 |
| 22. Obwiniam siebie za to, że nie wiem co zrobić .....                                                  | 1 | 2 | 3 | 4 | 5 |
| 23. Idę się zabawić .....                                                                               | 1 | 2 | 3 | 4 | 5 |
| 24. Staram się zrozumieć sytuację .....                                                                 | 1 | 2 | 3 | 4 | 5 |
| 25. "Zastygam w bezruchu" i nie wiem co zrobić .....                                                    | 1 | 2 | 3 | 4 | 5 |
| 26. Podejmuję natychmiast właściwe działanie .....                                                      | 1 | 2 | 3 | 4 | 5 |
| 27. Analizuję sytuację i uczę się na własnych błędach .....                                             | 1 | 2 | 3 | 4 | 5 |
| 28. Żałuję, że nie mogę zmienić tego co się stało, lub tego,<br>co odczuwałem(am) w związku z tym ..... | 1 | 2 | 3 | 4 | 5 |
| 29. Odwiedzam przyjaciela .....                                                                         | 1 | 2 | 3 | 4 | 5 |
| 30. Martwię się, jak sobie z tym poradzę .....                                                          | 1 | 2 | 3 | 4 | 5 |
| 31. Spędzam czas z bliską osobą .....                                                                   | 1 | 2 | 3 | 4 | 5 |
| 32. Wychodzę na spacer .....                                                                            | 1 | 2 | 3 | 4 | 5 |
| 33. Wmawiam sobie, że to się nigdy więcej nie powtórzy .....                                            | 1 | 2 | 3 | 4 | 5 |
| 34. Skupiam się na swoich ogólnych brakach .....                                                        | 1 | 2 | 3 | 4 | 5 |
| 35. Rozmawiam z kimś, kogo rady sobie cenię .....                                                       | 1 | 2 | 3 | 4 | 5 |
| 36. Analizuję problem zanim zacznę działać .....                                                        | 1 | 2 | 3 | 4 | 5 |
| 37. Dzwonię do kolegi lub koleżanki .....                                                               | 1 | 2 | 3 | 4 | 5 |
| 38. Wpadam w złość .....                                                                                | 1 | 2 | 3 | 4 | 5 |
| 39. Zmieniam kolejność spraw do załatwienia .....                                                       | 1 | 2 | 3 | 4 | 5 |
| 40. Oglądam film .....                                                                                  | 1 | 2 | 3 | 4 | 5 |
| 41. Dążę do kontrolowania sytuacji .....                                                                | 1 | 2 | 3 | 4 | 5 |
| 42. Podejmuję dodatkowy wysiłek, aby załatwić sprawę .....                                              | 1 | 2 | 3 | 4 | 5 |
| 43. Podchodzę do problemu z różnych stron .....                                                         | 1 | 2 | 3 | 4 | 5 |
| 44. "Robię sobie wolne", by uciec od problemu .....                                                     | 1 | 2 | 3 | 4 | 5 |
| 45. Wyładowuję się na innych .....                                                                      | 1 | 2 | 3 | 4 | 5 |
| 46. Wykorzystuję sytuację, aby udowodnić, że potrafię tego dokonać .....                                | 1 | 2 | 3 | 4 | 5 |
| 47. Staram się tak zorganizować sprawy, aby zapanować nad sytuacją .....                                | 1 | 2 | 3 | 4 | 5 |
| 48. Oglądam telewizję .....                                                                             | 1 | 2 | 3 | 4 | 5 |

**Sprawdź, czy ustosunkowałeś się do wszystkich stwierdzeń !**

Copyright © [1999], Multi-Health Systems Inc. Międzynarodowe prawo autorskie obowiązujące we wszystkich krajach w ramach Konwencji z Berna, Bilateralnej Konwencji o Prawie Autorskim i Uniwersalnej Konwencji o Prawie Autorskim. Wszystkie prawa zastrzeżone. Zabrania się dokonywania tłumaczenia lub powielania w całości lub w części, przechowywania w jakichkolwiek bankach danych oraz przesyłania w jakiegokolwiek formie lub jakimikolwiek środkami kopiującymi, mechanicznymi, elektronicznymi, zapisującymi lub innymi, bez wcześniejszej pisemnej zgody Multi-Health Systems Inc., 3770 Victoria Park Avenue, Toronto, Ontario M2H 3M6. Polskie wydanie zaadaptowane i opublikowane w 2003 roku przez Pracownię Testów Psychologicznych Polskiego Towarzystwa Psychologicznego, ul. Belwederska 6A, 00-762 Warszawa, na mocy licencji udzielonej przez Multi-Health Systems Inc.
